# Supplementary material
Source: publisher figshare collection journal article supplement (https://gsapubs.figshare.com/ndownloader/files/22537439)
Supplement: Supplementary file 1 [file 22537439]

## Sheet: RAW DATA
SUPPLEMENTAL DATA FILE 1: POWICK SEDIMENTOLOGICAL DATA
Modelled Calendrical Date	Depth(cm)	Sediment Accumulation Rate (mm/yr)	%Moisture	Organics (LOI@550)	Carbonate (LOI@950)	Mag. Sus x10ˉ⁶mg³kgˉ¹	Grain Size Inclusive Mean (ɸ)	Coarse Component (Dx90) (um)	Coarse Component (Dx90) (mm)	Sediment Power Index (Dx90/Dx10^3)	Very fine sand (63-125um)	Fine sand (125-250um)	Medium sand (250-500um)	Coarse sand (500-1000um)	Very coarse sand (1000-2000um)	% Sand
2017	1	2.35294	10.0386	18.3377	2.55929	12.198	4.5	169	0.169	9427.36	18.04	10.22	2.4	0.29	0	30.95
2015.4	2	2.35294	7.68741	17.2878	2.11553	30.178
2011.95	3	2.89855	4.22765	14.8736	1.98254	27.882	4.5	170	0.17	9595.7	18.55	10.84	2.3	0.2	0	31.89
2008.05	4	2.5641	3.44282	13.1128	1.89828	30.387
2004.25	5	2.63158	2.06377	11.4328	1.77847	35.271	4.61	166	0.166	10628.8	18.67	11.01	2.8	0.31	0	32.79
2000.4	6	2.5974	2.03593	10.5134	1.71149	14.884
1996.2	7	2.38095	1.43043	7.38786	1.93492	60.082	4.53	169	0.169	12718.7	18.42	11.17	2.4	0.41	0	32.4
1991.95	8	2.35294	2.73193	12.9901	1.75541	71.071
1987.2	9	2.10526	2.38459	9.26324	1.56342	104.12	4.5	166	0.166	13393.5	19.04	11.2	2.5	0.2	0	32.94
1983.15	10	2.46914	2.28204	8.02395	1.61677	128.74
1979.05	11	2.43902	2.13517	7.72638	1.54199	132.7	4.77	151	0.151	9994.86	19.78	11.37	2.7	0.01	0	33.85
1974.75	12	2.32558	2.10993	7.4443	1.70259	130.41
1970	13	2.10526	1.86997	7.423	1.72834	125.07	4.73	169	0.169	14951.6	19.01	11	3.88	1.09	0	34.98
1965.65	14	2.29885	1.8306	6.65182	1.54467	124.06
1961.5	15	2.40964	1.76443	6.57003	1.54404	124.64	4.72	153	0.153	8838.51	20.53	10.73	2.95	0.54	0	34.76
1957.3	16	2.38095	1.78232	6.23679	1.60324	118.96
1952.6	17	2.12766	1.61169	6	1.54286	104.29	4.69	165	0.165	12186.9	19.91	11.56	3.69	0.61	0	35.77
1948.25	18	2.29885	1.43108	5.88385	1.63016	123.29
1943.95	19	2.32558	1.61752	6.6621	1.3701	114.33	4.67	153	0.153	7547.28	20.95	10.96	2.97	0.46	0	35.35
1939.2	20	2.10526	1.44348	5.74583	1.53222	85.714
1934.95	21	2.35294	1.46417	5.45368	1.56497	84.739	4.58	167	0.167	8324.68	21.26	12.51	3.76	0.3	0	37.84
1930.65	22	2.32558	1.61779	5.55909	1.41099	77.271
1926.4	23	2.35294	1.35577	5.54502	1.37441	107.03	4.6	162	0.162	8272.7	21.29	12.41	3.45	0.11	0	37.26
1921.65	24	2.10526	1.41671	5.19078	1.41229	117.75
1917.45	25	2.38095	1.40552	5.04224	1.47835	120.37	4.59	163	0.163	7712.6	21.56	12.05	3.48	0.41	0	37.5
1913.25	26	2.38095	1.40965	4.95501	1.34352	128.51
1909.05	27	2.38095	1.3522	5.07679	1.35804	123.32	4.64	159	0.159	9377.29	21.54	12.35	3.09	0.13	0	37.12
1904.3	28	2.10526	1.29428	4.99655	1.38026	145.78
1900.2	29	2.43902	1.27399	5.01832	1.44974	134.62	4.59	156	0.156	6639.56	22.28	12.09	2.95	0.17	0	37.5
1895.9	30	2.32558	1.25465	5.36471	1.41176	141.41
1891.7	31	2.38095	1.37216	5.19172	1.40256	135.66	4.59	162	0.162	7911.77	21.69	12.61	3.3	0.25	0	37.85
1887.05	32	2.15054	1.51726	5.26383	1.43793	134.9
1882.8	33	2.35294	1.40578	5.18304	1.42582	150.3	4.74	143	0.143	6959.25	20.85	10.7	2.22	0.01	0	33.79
1878.4	34	2.27273	0.96043	3.84019	1.26067	160.72
1874.05	35	2.29885	0.902022	3.57815	1.30257	171.96	4.55	166	0.166	9348.58	22.62	13.91	3.32	0.03	0	39.89
1869.9	36	2.40964	1.05926	3.80538	1.29319	100.626
1865.2	37	2.12766	0.905474	3.33528	1.36802	125.667	4.54	154	0.154	5802.56	23.74	12.7	2.54	0.03	0	39.02
1861	38	2.38095	0.953595	3.55679	1.32416	146.676
1856.75	39	2.35294	1.01797	3.62556	1.48605	162.335	4.75	157	0.157	14693.5	20.61	12.44	2.86	0.03	0	35.95
1852.05	40	2.12766	0.898059	3.28507	1.32705	176.125
1847.85	41	2.38095	0.967491	3.58404	1.42968	180.35	4.57	163	0.163	9635.55	22.79	13.72	3.08	0.02	0	39.61
1843.65	42	2.38095	0.821049	3.36867	1.30075	168.84
1839.05	43	2.17391	0.900032	3.24079	1.36913	141.805	4.64	148	0.148	7184.54	22.85	12.03	2.14	0	0	37.01
1834.85	44	2.38095	0.939064	3.28913	1.37784	125.61
1830.6	45	2.35294	0.91704	3.6639	1.43634	116.12	4.97	122	0.122	8159.46	19.81	8.27	1.24	0	0	29.33
1826.5	46	2.43902	1.13173	3.77181	1.50122	136.18
1821.9	47	2.17391	1.32084	3.92218	1.57198	112.14	4.83	131	0.131	6813.65	21.1	9.57	1.44	0	0	32.12
1817.65	48	2.35294	1.23476	4.0671	1.61418	132.16
1813.6	49	2.46914	1.11141	4.13925	1.5625	108.68	5.07	122	0.122	11279.3	18.87	8.27	1.13	0	0	28.26
1809	50	2.17391	1.11135	3.92243	1.49846	104.49
1804.95	51	2.46914	1.15195	3.6626	1.58158	102.37	5.1	120	0.12	10162.8	18.01	7.87	1.29	0	0	27.17
1801	52	2.53165	1.49972	4.33021	1.66224	101.94
1796.85	53	2.40964	1.41509	4.61582	1.66057	113.79	4.97	123	0.123	8078.56	19.82	8.75	0.91	0	0	29.49
1792.2	54	2.15054	0.82435	4.34783	1.59847	102.29
1788.05	55	2.40964	1.24817	3.9801	1.64045	109.81	5.11	125	0.125	14467	18.37	8.64	1.28	0	0	28.29
1784.1	56	2.53165	1.3089	3.91247	1.60477	97.51
1780	57	2.43902	1.25109	3.80084	1.59635	90.465	5	127	0.127	9626.94	19.05	9.39	0.97	0	0	29.41
1775.85	58	2.40964	1.70501	4.22954	1.77023	98.232
1771.75	59	2.43902	1.68095	4.55917	1.89407	112.26	5.23	116	0.116	12947.7	16.46	7.42	1.21	0	0	25.09
1767.5	60	2.35294	1.8208	4.5998	1.92777	128.5
1763.35	61	2.40964	1.70595	4.59009	1.87257	130.61	5.23	118	0.118	13629	16.25	7.76	1.12	0	0	25.13
1758.55	62	2.08333	1.68385	4.6662	1.90493	107.97
1754.35	63	2.38095	1.94312	4.51444	2.00787	97.589	5.59	96.4	0.0964	13287.6	12.56	5.31	0.85	0	0	18.73
1750	64	2.29885	1.55679	4.21172	1.95256	74.903
1745.25	65	2.10526	1.5356	4.4581	1.98488	116.03	5.81	79	0.079	9500.68	10.53	3.66	0.25	0	0	14.44
1741	66	2.35294	1.36302	4.97467	1.54307	141.48
1736.75	67	2.35294	1.46032	4.70361	1.58935	104.19	5.81	82.1	0.0821	11014.1	10.4	4.1	0.43	0	0	14.92
1732.65	68	2.43902	1.29205	4.78447	1.60235	122.69
1727.9	69	2.10526	1.47971	4.86111	1.56654	113.88	5.05	117	0.117	7719.56	18.82	7.96	0.56	0	0	27.34
1723.85	70	2.46914	1.69063	4.77305	1.53252	98.213
1719.75	71	2.43902	1.58453	4.92483	1.58636	70.6755	5.07	110	0.11	5478.03	18.52	7.15	0.16	0	0	25.82
1715.05	72	2.12766	1.2926	5.04066	1.61559	112.391
1710.95	73	2.43902	1.39571	4.92432	1.56271	120.24	5.04	125	0.125	9755.79	18.26	8.62	1.37	0	0	28.25
1706.8	74	2.40964	1.53469	4.92639	1.59619	139.99
1702.2	75	2.17391	1.61154	5.00489	1.63218	118.835	5.04	119	0.119	8289.13	19	8.04	0.83	0	0	27.87
1698	76	2.38095	1.4584	5.16229	1.61604	175.51
1693.35	77	2.15054	1.83035	4.92556	1.6836	185.05	5.34	86.7	0.0867	3751.07	14.42	3.89	0.14	0	0	18.45
1689.2	78	2.40964	1.82222	5.03999	1.67497	151.34
1684.9	79	2.32558	1.6087	4.81159	1.69729	123.33	5.4	83.2	0.0832	3698.48	13.44	3.51	0.12	0	0	17.07
1680	80	2.04082	1.58238	4.8732	1.6907	120.87
1675.7	81	2.32558	1.75901	4.69114	1.71889	89.503	5.47	77.5	0.0775	3039.79	12.21	2.83	0.13	0	0	15.16
1671.1	82	2.17391	1.82037	4.56635	1.79283	77.134
1666.95	83	2.40964	1.75848	4.51871	1.75241	74.813	5.51	73.9	0.0739	2821.16	11.58	2.35	0.06	0	0	14
1662.45	84	2.22222	1.67377	4.65714	1.75044	80.889
1658.2	85	2.35294	1.78415	4.48425	1.76575	63.04	5.5	81.8	0.0818	5238.38	13.52	3.13	0.05	0	0	16.69
1653.5	86	2.12766	1.59121	4.56208	1.79018	78.828
1649.55	87	2.53165	1.53718	4.59916	1.79325	120.07	5.29	85.5	0.0855	3410.78	16.38	2.75	0	0	0	19.14
1645.5	88	2.46914	1.54505	4.65116	1.73946	131.16
1640.9	89	2.17391	1.57157	4.5991	1.83964	133.38	5.54	70.4	0.0704	2397.51	10.59	2.06	0.05	0	0	12.7
1636.25	90	2.15054	1.56927	4.5703	1.85241	113.97
1632.05	91	2.38095	1.67291	4.43719	1.8511	110.7	5.45	75	0.075	2591.83	12.74	1.96	0	0	0	14.7
1627.6	92	2.24719	1.63034	4.5493	1.82648	110.53
1623.4	93	2.38095	1.81624	4.54842	1.74102	92.951	5.49	76.9	0.0769	3573.35	12.5	2.59	0.06	0	0	15.15
1618.9	94	2.22222	2.0281	4.25847	1.71522	90.971
1614.75	95	2.40964	2.3375	4.21093	1.66389	103.87	5.49	75.5	0.0755	3132.5	12	2.54	0.09	0	0	14.63
1610.2	96	2.1978	1.84151	4.34233	1.70742	94.592
1606.35	97	2.5974	1.63807	4.30214	1.68517	84.557	5.61	70.2	0.0702	3147.78	10.63	1.97	0.04	0	0	12.64
1601.95	98	2.27273	1.76685	4.33896	1.68737	86.497
1597.8	99	2.40964	1.82177	4.12865	1.73187	100.44	5.44	77.4	0.0774	2994.33	12.98	2.49	0	0	0	15.47
1593.1	100	2.12766	2.24462	4.20181	1.67135	101.87
1589.05	101	2.46914	2.00516	4.25446	1.62075	118.18	5.64	66.9	0.0669	2483.69	9.81	1.68	0	0	0	11.5
1585.2	102	2.5974	1.81438	4.28808	1.75314	123.28
1580.9	103	2.32558	2.03642	4.25891	1.75765	123.12	5.42	78.7	0.0787	2961.98	13.04	2.75	0.04	0	0	15.84
1577.1	104	2.63158	2.10243	4.18214	1.61473	135.79
1573.1	105	2.5	2.33966	4.17163	1.62098	117.18	5.23	88.9	0.0889	3420.97	17.42	3.14	0	0	0	20.57
1568.55	106	2.1978	2.45604	4.08543	1.69492	99.609
1564.55	107	2.5	2.19051	4.06962	1.89404	91.944	5.49	74.6	0.0746	2902.09	12.31	2.15	0.01	0	0	14.47
1560.3	108	2.35294	2.10426	4.18906	1.62433	89.834
1555.85	109	2.24719	1.75702	4.31061	1.66616	49.542	5.24	96.9	0.0969	5351.09	16.25	5.15	0.29	0	0	21.69
1551.55	110	2.32558	1.62786	4.28324	1.74823	85.442
1547.65	111	2.5641	1.86944	4.11009	1.78548	133.5	5.94	55.1	0.0551	2194.61	6.37	0.99	0	0	0	7.36
1542.9	112	2.10526	1.84413	3.98121	1.78931	155.26
1538.55	113	2.29885	1.88007	3.97338	1.75474	173.05	5.82	60.4	0.0604	2339.25	7.73	1.42	0.01	0	0	9.16
1533.95	114	2.17391	3.5679	3.95596	1.79234	183.95
1529.2	115	2.10526	3.01237	4.0673	1.86726	160.26	5.92	55.3	0.0553	2156.97	6.36	1.05	0.01	0	0	7.43
1524.4	116	2.08333	4.05522	4.09173	1.93345	138.04
1520.2	117	2.38095	5.09981	4.08414	1.91924	122.32	6.07	50	0.05	1967.85	5.07	0.78	0	0	0	5.85
1515.8	118	2.27273	5.39712	4.04282	1.8735	96.324
1511.35	119	2.24719	4.96925	4.13899	2.06098	94.536	6.08	49.8	0.0498	2050.36	4.88	0.81	0.03	0	0	5.71
1506.8	120	2.1978	5.65549	4.11671	2.05113	98.493
1502.15	121	2.15054	5.657	4.06064	2.04385	92.589	6.13	47.8	0.0478	1841.15	4.42	0.83	0	0	0	5.25
1497.6	122	2.1978	5.30907	4.16137	2.04892	95.741
1493.55	123	2.46914	6.56168	4.0475	2.13228	102.35	5.96	53.3	0.0533	2000.6	5.77	1.05	0.02	0	0	6.84
1489.35	124	2.38095	6.15053	3.93923	2.1551	104.83
1484.5	125	2.06186	6.70817	3.82677	2.16533	92.37	6.12	47.3	0.0473	1811.71	4.18	0.84	0.02	0	0	5.04
1480.1	126	2.27273	6.68128	4.06358	2.14236	91.521
1476.1	127	2.5	6.258	3.9727	2.06143	96.342	6.09	48.1	0.0481	1778.54	4.6	0.53	0	0	0	5.13
1471.6	128	2.22222	6.81773	3.60495	2.06911	103.87
1467.5	129	2.43902	6.3247	3.72142	2.13982	83.458	6.05	50.1	0.0501	2056.01	4.67	1.08	0.14	0	0	5.9
1463.35	130	2.40964	5.57864	4.04358	2.03226	79.995
1459.1	131	2.35294	6.06162	4.082	2.04991	79.86	6.19	46.1	0.0461	1785.47	4.06	0.77	0.01	0	0	4.84
1454.7	132	2.27273	7.03091	3.79302	2.08382	74.338
1450.85	133	2.5974	6.91244	3.81413	2.12646	74.462	6.06	51	0.051	2152.38	4.94	0.97	0.36	0	0	6.26
1446.8	134	2.46914	7.15138	3.81019	2.03366	79.093
1442.25	135	2.1978	7.53747	3.87456	1.98523	80.808	6.13	49.1	0.0491	2090.5	4.48	0.99	0.39	0	0	5.86
1438.1	136	2.40964	6.93192	3.57238	2.07038	100.642
1434.2	137	2.5641	6.90472	3.61938	2.06635	75.0545	6.1	47.9	0.0479	1910.93	4.07	1.03	0.17	0	0	5.27
1429.9	138	2.32558	7.04181	3.61966	2.01893	65.6115
1426.05	139	2.5974	6.78152	3.60534	2.03283	106.9	6.13	49.7	0.0497	2423.62	4.33	1.19	0.62	0	0	6.14
1421.95	140	2.43902	7.60114	3.28071	2.1337	79.861
1417.75	141	2.38095	7.64291	3.23108	2.14042	107.28	6.11	48.9	0.0489	2182.24	4.09	1.23	0.51	0	0	5.83
1413.75	142	2.5	7.61499	3.28939	2.04787	120.06
1410.1	143	2.73973	8.12283	3.16559	2.13142	126.08	6.11	49.4	0.0494	2179.75	4.29	1.25	0.47	0	0	6
1406.35	144	2.66667	7.90297	3.15572	2.19687	121.4
1402.5	145	2.5974	8.51084	3.13261	2.20129	110.89	6.09	51.3	0.0513	2601.51	4.6	1.32	0.73	0.01	0	6.66
1398.35	146	2.40964	8.5048	3.31198	2.15347	114.57
1394.6	147	2.66667	8.54211	3.09131	2.17822	138.28	6.09	49.6	0.0496	2277.3	4.62	1	0.22	0	0	5.84
1390.75	148	2.5974	8.3977	3.05987	2.30093	152.06
1386.8	149	2.53165	9.0425	3.13817	2.30679	208.62	6.18	46.2	0.0462	1978.71	3.86	0.97	0.14	0	0	4.98
1382.25	150	2.1978	8.94358	3.23693	2.28031	186.5
1378.75	151	2.85714	8.51815	3.53719	1.8292	147.99	6.15	48.2	0.0482	2157.82	4.12	1.17	0.39	0	0	5.68
1374.9	152	2.5974	9.33218	3.4214	1.87227	130.5
1370.9	153	2.5	8.70067	3.60961	1.89677	121.47	6.12	48.7	0.0487	2207.86	4.34	1.01	0.28	0	0	5.63
1367	154	2.5641	8.27102	3.56966	1.84042	118.65
1363	155	2.5	8.66277	3.61047	1.83284	129.82	6.1	49.6	0.0496	2155.02	4.5	1.16	0.34	0	0	6
1358.5	156	2.22222	8.2106	3.51232	1.86987	105.18
1354.45	157	2.46914	8.41231	3.45637	1.83486	100.76	6.17	46	0.046	1921.62	3.76	0.82	0.18	0	0	4.76
1350.3	158	2.40964	8.45635	3.54757	1.83138	111.5
1346.25	159	2.46914	7.98067	3.46345	1.74592	104.25	6.12	48.2	0.0482	2040.75	4.3	1.05	0.14	0	0	5.49
1342	160	2.35294	8.09315	3.22949	1.72378	100.36
1337.95	161	2.46914	7.9689	3.17963	1.66608	104.85	6.01	52.2	0.0522	2273.21	5.11	1.38	0.23	0	0	6.72
1334.2	162	2.66667	7.43262	3.16009	1.66948	111.9
1329.8	163	2.27273	7.83515	3.13856	1.6119	127.6	6.01	53	0.053	2471.55	5.27	1.35	0.31	0	0	6.93
1325.9	164	2.5641	8.27848	3.33841	1.71814	124.49
1322	165	2.5641	9.01213	3.21325	1.73913	107.23	6.08	52.6	0.0526	2992.81	5.15	1.29	0.46	0	0	6.9
1318.2	166	2.63158	8.42589	3.28287	1.65968	99.733
1314.35	167	2.5974	7.84148	3.24821	1.64454	99.003	5.7	73.1	0.0731	4432.74	8.96	3.17	0.66	0	0	12.78
1310.55	168	2.63158	7.77697	3.17101	1.67262	94.607
1306.15	169	2.27273	7.37849	3.11907	1.66491	102.73	5.92	57.1	0.0571	2761.37	6.41	1.53	0.21	0	0	8.15
1302.15	170	2.5	7.01468	3.01342	1.60991	97.081
1298.2	171	2.53165	7.97227	3.17326	1.69492	78.2075	6.05	51	0.051	2576.81	5.06	0.87	0.1	0	0	6.02
1294.3	172	2.5641	7.23037	3.07894	1.69101	100.551
1290	173	2.32558	7.82459	3.19743	1.66833	124.832	6	52.6	0.0526	2416.01	5.45	1.01	0.11	0	0	6.57
1286.05	174	2.53165	7.3552	3.14031	1.6235	144.515
1282.15	175	2.5641	7.4028	3.03015	1.68	159.5	5.91	55.3	0.0553	2872.94	6.12	1.06	0.12	0	0	7.29
1278.25	176	2.5641	8.42095	2.95838	1.66685	149.23
1274.05	177	2.38095	7.74012	2.91947	1.63619	133.08	5.89	54.3	0.0543	2357.32	6.39	0.36	0	0	0	6.75
1270.25	178	2.63158	8.6069	3.16933	1.73559	146.59
1266.4	179	2.5974	8.71243	3.07456	1.79349	135.81	5.95	55.5	0.0555	3165.22	5.74	1.49	0.34	0	0	7.57
1262.5	180	2.5641	8.81263	3.10101	1.79136	123.23
1258.1	181	2.27273	9.87488	3.19451	1.88088	129.23	6.02	51.8	0.0518	2929.97	5.24	0.71	0.19	0	0	6.14
1254.25	182	2.5974	9.51977	3.34062	1.76397	132.26
1250.4	183	2.5974	10.3482	3.23194	1.7925	129.63	6.05	52.1	0.0521	3134.46	5.2	0.86	0.36	0.02	0	6.45
1246	184	2.27273	9.93042	3.16878	1.7808	121.75
1242.1	185	2.5641	9.55478	3.125	1.76991	112.77	5.97	54	0.054	2869.66	5.9	1.01	0.01	0	0	6.92
1238.2	186	2.5641	9.58841	3.17904	1.75483	130.36
1233.95	187	2.35294	9.3554	3.18021	1.73734	161.8	6	53.2	0.0532	2924.87	5.52	1	0.18	0	0	6.69
1230.2	188	2.66667	10.2705	3.07471	1.74153	192.47
1226.4	189	2.63158	10.2827	3.22685	1.7915	212.74	6.03	52.5	0.0525	2927.38	5.52	0.98	0.01	0	0	6.52
1222.1	190	2.32558	10.2868	3.22711	1.75474	197.08
1218.3	191	2.63158	10.0058	3.14587	1.70222	169.99	5.91	58.3	0.0583	3527.03	6.63	1.66	0.23	0	0	8.52
1214.45	192	2.5974	10.0962	3.16661	1.76156	152.22
1210.65	193	2.63158	10.0117	3.08094	1.74423	137.82	5.92	57.7	0.0577	3473.38	6.49	1.7	0.14	0	0	8.33
1206.4	194	2.35294	9.69287	3.02615	1.69135	135.45
1202.55	195	2.5974	9.16289	3.02615	1.67466	140.35	6.01	54.7	0.0547	3421.7	5.9	1.34	0.05	0	0	7.29
1198.7	196	2.5974	8.84735	3.18979	1.66325	132.26
1194.45	197	2.35294	8.76658	3.13476	1.65895	134.09	5.91	58.8	0.0588	3917.47	6.9	1.6	0.17	0	0	8.68
1190.55	198	2.5641	6.65875	3.09519	1.56879	143.39
1186.75	199	2.63158	6.14678	3.15226	1.63734	143.92	5.88	58	0.058	3472.86	6.92	1.31	0.07	0	0	8.3
1183.45	200	3.0303	6.11511	3.09845	1.61586	139.14
1179.85	201	2.77778	6.672	3.12018	1.64581	123.16	5.92	55.9	0.0559	3505.03	6.57	0.81	0	0	0	7.38
1176.5	202	2.98507	7.05513	3.37363	1.63059	128.81
1172.6	203	2.5641	8.35221	3.15311	1.61115	142.55	5.95	54.8	0.0548	3498	6.39	0.59	0	0	0	6.98
1169.3	204	3.0303	7.78599	3.08962	1.63915	127.36
1165.6	205	2.7027	7.92961	3.03617	1.58461	122.86	5.92	56.7	0.0567	3569.66	6.48	1.14	0.16	0	0	7.78
1162.4	206	3.125	7.07357	3.1797	1.54167	125.93
1158.55	207	2.5974	8.08511	3.18287	1.62037	119.88	6	53.5	0.0535	3201.41	5.61	1.07	0.09	0	0	6.77
1155.35	208	3.125	6.50142	3.10734	1.65146	126.38
1151.65	209	2.7027	8.01771	3.16845	1.67112	127.17	5.91	58.4	0.0584	3838.06	6.78	1.35	0.36	0	0	8.5
1148.4	210	3.07692	7.26536	3.24942	1.64398	106.75
1144.65	211	2.66667	7.02118	3.21862	1.65883	106.75	5.93	56.7	0.0567	3569.66	6.33	1.38	0.16	0	0	7.88
1141.25	212	2.94118	6.57528	3.48846	1.78331	111.11
1137.4	213	2.5974	6.00832	3.60995	1.75178	116.82	5.89	60.2	0.0602	3284.16	6.9	1.82	0.3	0	0	8.96
1134	214	2.94118	7.88547	4.93332	1.80115	121.45
1130.05	215	2.53165	8.86651	4.31203	1.84182	127.34	5.85	64.2	0.0642	3106.33	7.46	2.51	0.38	0	0	10.34
1126.75	216	3.0303	10.2078	4.24979	1.74714	113.04
1122.9	217	2.5974	10.1084	4.38279	1.83621	150.4	6.1	51.9	0.0519	2338.69	5.07	1.47	0.4	0	0	6.94
1119.1	218	2.63158	10.067	4.3402	1.8413	161.16
1115.8	219	3.0303	8.55162	4.14209	1.72704	197.45	5.84	64.9	0.0649	3209.05	7.59	2.42	0.54	0	0	10.55
1112.5	220	3.0303	7.03759	4.13253	1.62095	202.2
1108.8	221	2.7027	9.45434	4.19944	1.81426	154.52	5.89	59.4	0.0594	2511.39	6.97	1.73	0.24	0	0	8.94
1104.95	222	2.5974	9.85532	4.15108	1.8704	146.58
1101.6	223	2.98507	10.1336	4.07812	1.94079	134.17	5.54	78.1	0.0781	4254.14	11.49	3.2	0.26	0	0	14.96
1097.85	224	2.66667	8.82699	4.12531	1.77904	123.56
1093.95	225	2.5641	9.12059	4.0445	1.88898	122.08	5.85	59.8	0.0598	2544.96	7.54	1.44	0	0	0	8.98
1090.65	226	3.0303	9.34827	3.77358	1.90848	117.99
1086.8	227	2.5974	8.69904	3.49829	1.89135	142.82	5.92	57	0.057	2517.58	6.69	1.32	0.05	0	0	8.06
1083.05	228	2.66667	8.4627	3.55696	1.92106	132.98
1079.8	229	3.07692	9.13609	3.45102	1.95922	141.14	5.99	54.2	0.0542	2327.17	5.92	1.22	0.06	0	0	7.2
1076.05	230	2.66667	9.30704	3.62055	2.01011	142.8
1072.8	231	3.07692	9.73292	3.73449	2.00576	151.51	6.13	49.2	0.0492	2389.75	4.33	1.11	0.4	0.02	0	5.87
1068.95	232	2.5974	8.94397	3.66864	1.99869	158.91
1065.65	233	3.0303	9.26737	3.49973	2.06253	180.88	6.17	47.7	0.0477	2326.2	4.15	0.99	0.23	0	0	5.37
1061.85	234	2.63158	9.8811	3.38205	2.11273	181.57
1058.1	235	2.66667	11.3369	3.88598	2.36184	189.58	6.18	47.2	0.0472	2311.11	4.06	1.03	0.08	0	0	5.16
1054.85	236	3.07692	12.2843	4.15591	2.34846	186.04
1051.1	237	2.66667	12.2534	4.19162	2.21444	173.91	6.37	39.8	0.0398	1819.69	2.59	0.01	0	0	0	2.6
1047.3	238	2.63158	12.328	4.13802	2.41276	165.94
1043.55	239	2.66667	12.4153	4.16613	2.38617	159.01	6.45	38.2	0.0382	1984.13	2.25	0.01	0	0	0	2.26
1040.35	240	3.125	11.9239	4.03703	2.28851	129.27
1036.65	241	2.7027	11.708	4.07728	2.07	145.76	6.28	41	0.041	1580.24	2.58	0.56	0	0	0	3.14
1033.3	242	2.98507	11.1283	4.01338	2.19398	152.63
1029.4	243	2.5641	11.2681	3.94682	2.27115	154.89	6.26	41.3	0.0413	1657.2	2.53	0.56	0.02	0	0	3.11
1026.15	244	3.07692	11.5225	3.86761	2.04159	148.05
1022.3	245	2.5974	10.1117	3.94414	1.99509	150.02	6.25	42	0.042	1868.46	2.55	0.67	0.13	0	0	3.34
1018.45	246	2.5974	10.0817	3.7969	2.08457	150.9
1015.2	247	3.07692	11.1991	3.68761	2.10561	151.49	6.25	41.7	0.0417	1796.91	2.74	0.11	0	0	0	2.85
1011.4	248	2.63158	11.1347	3.90215	2.02864	157.32
1008.05	249	2.98507	11.0093	3.95972	1.9913	160.76	6.22	43.1	0.0431	2001.49	2.68	0.47	0.42	0.01	0	3.57
1004.25	250	2.63158	10.8433	3.73612	2.04196	175.97
1000.4	251	2.5974	12.093	3.8836	2.19048	99.3615	6.28	41.8	0.0418	2127.55	2.42	0.45	0.29	0	0	3.17
997.1	252	3.0303	10.7592	3.90681	2.09705	149.225
993.4	253	2.7027	11.2299	3.83663	2.05772	148.92	6.26	43.5	0.0435	2189.44	3.03	0.62	0.23	0	0	3.89
989.55	254	2.5974	10.6038	3.77051	2.13862	135.97
986.2	255	2.98507	11.707	3.57285	2.17017	143.65	6.27	42.6	0.0426	1984.4	3.03	0.44	0	0	0	3.47
982.45	256	2.66667	10.4822	3.42635	2.04875	153.29
978.6	257	2.5974	10.4226	3.53383	2.01128	166.3	6.2	43.2	0.0432	1929.58	2.88	0.41	0	0	0	3.29
975.4	258	3.125	9.83662	3.53073	2.12965	155.61
971.6	259	2.63158	10.4077	3.47966	2.08779	178.54	6.05	46.4	0.0464	1750.54	3.67	0.43	0	0	0	4.1
968.3	260	3.0303	9.8748	3.33856	2.15102	173.35
964.55	261	2.66667	11.1898	3.38915	2.04678	152.01	6.21	44.4	0.0444	2328.17	3.13	0.57	0.14	0	0	3.84
960.85	262	2.7027	10.7816	3.63343	1.74943	140.55
957.7	263	3.1746	12.6065	4.05793	1.96444	146.21	6.03	47.4	0.0474	1823.22	3.88	0.62	0	0	0	4.5
953.95	264	2.66667	12.6808	3.98303	1.91623	135.86
950.1	265	2.5974	12.6433	4.00394	1.90351	131.48	6.06	46.4	0.0464	1849.6	3.65	0.5	0.01	0	0	4.16
946.85	266	3.07692	11.1992	3.72752	1.69108	128.65
943.2	267	2.73973	11.2325	3.84747	1.77839	136.2	6.1	45.4	0.0454	1956.36	3.37	0.49	0.02	0	0	3.88
939.4	268	2.63158	11.6282	3.96217	1.8751	147.96
936.1	269	3.0303	10.956	3.77306	1.74782	144.05	6.14	44.9	0.0449	1924.05	3.25	0.49	0.04	0	0	3.78
932.3	270	2.63158	10.773	3.73634	1.68054	146.56
928.95	271	2.98507	10.5863	3.71901	1.72476	134.59	6.06	45.7	0.0457	1767.15	3.42	0.53	0	0	0	3.96
925.4	272	2.8169	10.3618	3.7844	1.74312	126.25
921.65	273	2.66667	11.2373	3.82521	1.75606	126.31	6.07	45.1	0.0451	1632.8	3.36	0.24	0	0	0	3.6
918.35	274	3.0303	11.4434	3.91673	1.77332	117.27
915.05	275	3.0303	12.0501	3.91262	1.79732	129.26	6.08	46.4	0.0464	2037.56	3.63	0.56	0.01	0	0	4.19
911.25	276	2.63158	12.0506	3.87652	1.77615	144.2
907.6	277	2.73973	12.1142	3.8391	1.76887	149.72	6.15	44.6	0.0446	1999.84	3.29	0.39	0	0	0	3.68
904.4	278	3.125	12.3391	3.75617	1.76761	146.86
900.7	279	2.7027	12.4809	3.75466	1.77239	148.14	6.12	45.4	0.0454	1972.61	3.56	0.48	0	0	0	4.03
897.05	280	2.73973	12.7129	3.93381	1.84202	140.06
893.8	281	3.07692	12.485	4.00149	1.77706	142.92	6.11	46.3	0.0463	2237.35	3.68	0.59	0.03	0	0	4.3
890.3	282	2.85714	11.9444	3.92068	1.80261	159
886.65	283	2.73973	11.8646	3.8699	1.85213	168.38	6.14	44.9	0.0449	1892.43	3.39	0.51	0.01	0	0	3.91
883.65	284	3.33333	12.3519	3.80818	1.84532	166.4
880	285	2.73973	12.9802	3.97587	1.87826	187.57	6.17	44.6	0.0446	1949.84	3.32	0.57	0.01	0	0	3.9
876.7	286	3.0303	12.8156	3.99782	1.95812	199.06
873	287	2.7027	12.9377	3.98045	1.92737	208.99	6.11	46.7	0.0467	2129.27	4.14	0.1	0	0	0	4.24
869.25	288	2.66667	13.4031	3.98601	1.9612	188.44
865.35	289	2.5641	12.9918	3.76663	1.86084	179.87	6.12	45.2	0.0452	1899.05	3.29	0.54	0.12	0	0	3.95
861.85	290	2.85714	13.2652	3.8162	1.92757	171.31
857.7	291	2.40964	13.2056	3.81836	1.97266	149.51	6.04	47.4	0.0474	1866.18	3.92	0.57	0	0	0	4.5
853.65	292	2.46914	12.6955	3.65781	1.88862	158.12
849.4	293	2.35294	12.1432	3.69014	1.84977	167.76	6.14	44.8	0.0448	1895.43	3.27	0.47	0.1	0	0	3.85
845	294	2.27273	12.5911	3.88095	2.02381	189.12
840.75	295	2.35294	12.5119	3.82996	2.06438	205.83	6.13	47.4	0.0474	2483.88	4.04	0.73	0.08	0	0	4.85
836.75	296	2.5	13.1529	3.78335	2.06992	199.65
833	297	2.66667	13.3459	3.9351	2.04625	157.75	6.21	46	0.046	2635.97	4.01	0.46	0	0	0	4.47
828.75	298	2.35294	12.7964	3.80863	1.91988	131.67
824.45	299	2.32558	12.5157	3.9267	2.0288	74.126	6.12	50.7	0.0507	3201.46	5.06	0.92	0.06	0	0	6.04
820	300	2.24719	12.0684	3.81717	1.99368	119.73
815.65	301	2.29885	12.0684	3.81717	2.01	145.8	6.1	51.9	0.0519	3151.32	5.18	1.28	0.15	0	0	5.18
811.6	302	2.46914	13.5109	4.0768	2.0571	130.81
807.4	303	2.38095	13.8652	4.02725	1.98375	125.08	6.08	53.5	0.0535	3175.1	5.31	1.49	0.37	0	0	7.17
803.1	304	2.32558	14.4665	3.85548	2.02473	134.92
798.95	305	2.40964	14.915	3.92047	2.01651	119.84	6.13	48.4	0.0484	2450.49	4.35	0.8	0.07	0	0	5.21
794.9	306	2.46914	14.9767	4.20409	2.12076	110.2
790.7	307	2.38095	15.1594	4.13588	2.02739	110.98	6.18	44.7	0.0447	2137.64	3.23	0.13	0.42	0.02	0	3.8
786.55	308	2.40964	15.4383	3.86006	1.99141	115.7
782.9	309	2.73973	15.1054	3.93334	2.05983	120.26	6.2	45.8	0.0458	2555.42	3.5	0.37	0.49	0.01	0	4.37
778.65	310	2.35294	14.6197	4.00694	2.03541	126.39
774.4	311	2.35294	14.9554	3.87244	2.02278	124.88	6.1	47.4	0.0474	2136.94	4.02	0.53	0.05	0	0	4.6
770.35	312	2.46914	15.4522	3.86866	2.04447	119.45
766.4	313	2.53165	16.029	3.81179	2.05479	111.24	6.18	45.5	0.0455	2274.08	3.42	0.52	0.18	0	0	4.13
762.3	314	2.43902	15.7006	3.94479	2.0363	118.34
758.25	315	2.46914	15.7113	3.73824	2.07015	115.38	6.13	46.6	0.0466	2205.51	3.77	0.5	0.12	0	0	4.39
754	316	2.35294	15.7174	3.80329	2.12657	113.15
749.95	317	2.46914	15.7725	3.75928	2.04767	123.39	6.15	46.1	0.0461	2246.34	3.72	0.47	0.04	0	0	4.22
745.7	318	2.35294	15.5271	3.97943	2.05739	126.99
741.6	319	2.43902	15.7644	3.64393	2.04433	117.95	6.14	46.2	0.0462	2204.15	3.77	0.24	0.14	0	0	4.14
737.4	320	2.38095	15.0809	3.83387	2.10422	127.91
733.15	321	2.35294	15.3643	3.58654	2.03237	124.71	6.11	47.6	0.0476	2311.6	4.07	0.37	0.14	0	0	4.58
729.05	322	2.43902	15.1635	3.66322	2.01101	133.57
725.55	323	2.85714	15.237	3.74101	2.11031	149.78	6.15	46.7	0.0467	2315.4	3.97	0.45	0	0	0	4.42
721.4	324	2.40964	16.4741	3.24634	1.95093	145.69
717.05	325	2.29885	16.3439	3.27078	1.98854	162.315	6.21	45.6	0.0456	2687.03	3.52	0.17	0.46	0.01	0	4.17
712.85	326	2.38095	16.3876	3.28275	1.89905	161.475
708.75	327	2.43902	16.9173	2.78192	1.79467	156.14	6.07	48.8	0.0488	2331.93	4.46	0.54	0.01	0	0	5.01
704.6	328	2.40964	16.7942	2.65109	1.87541	166.085
700.6	329	2.5	16.953	2.66026	1.8162	152.205	6.14	47.4	0.0474	2593.45	3.94	0.4	0.34	0	0	4.68
696.5	330	2.43902	16.6725	2.75138	1.71389	178.8
692.45	331	2.46914	16.2202	2.7638	1.70313	165.4	6.07	48.1	0.0481	2144.41	4.47	0.21	0	0	0	4.68
688.3	332	2.40964	18.2719	2.77319	1.68962	156.7
684.2	333	2.43902	18.2923	2.87391	1.76005	158.19	6.05	47.6	0.0476	1860.75	4.09	0.36	0.05	0	0	4.5
680.2	334	2.5	18.1839	2.94817	1.72135	152.39
676	335	2.38095	18.2527	2.93271	1.73624	149.96	6.05	48.8	0.0488	2117.92	4.38	0.54	0.14	0	0	5.07
672	336	2.5	18.262	2.96404	1.80758	149.69
668	337	2.5	18.2656	2.96227	1.78854	149.47	6.14	46.9	0.0469	2426.85	3.88	0.49	0.11	0	0	4.48
663.75	338	2.35294	18.0838	2.92615	1.71414	145.83
659.65	339	2.43902	18.5451	2.96332	1.74885	145.79	6.13	47.1	0.0471	2395.71	3.88	0.36	0.28	0	0	4.53
655.6	340	2.46914	18.815	2.94388	1.80926	154.23
651.95	341	2.73973	18.2934	2.89256	1.77498	159.07	6.17	46.2	0.0462	2553.73	3.74	0.49	0.08	0	0	4.3
647.95	342	2.5	18.2187	2.93403	1.74876	159.79
644	343	2.53165	18.8788	2.96688	1.79922	172.1	6.21	45.9	0.0459	2869.66	3.7	0.53	0.03	0	0	4.26
639.95	344	2.46914	18.5512	2.90568	1.80644	178.01
636.4	345	2.8169	18.0938	2.90916	1.8018	184.13	6.21	45.9	0.0459	2869.66	3.7	0.53	0.03	0	0	4.26
632.25	346	2.40964	18.4016	2.91381	1.82827	175.62
628.7	347	2.8169	18.5369	2.89543	1.85623	164.05	6.17	46.2	0.0462	2744	3.89	0.27	0	0	0	4.16
624.75	348	2.53165	18.3193	2.91236	1.91435	157.58
621.35	349	2.94118	18.3245	2.82734	1.83914	160.26	6.14	47.6	0.0476	2672.63	4.16	0.5	0	0	0	4.66
617.95	350	2.94118	18.6487	2.79039	1.80167	154.08
614.05	351	2.5641	18.8374	2.83704	1.77406	159.73	6.17	47.6	0.0476	3056.32	4.23	0.37	0	0	0	4.6
610.7	352	2.98507	18.4531	2.74879	1.83772	136.41
607.2	353	2.85714	18.431	2.80797	1.89394	128.34	6.12	48.8	0.0488	2830.1	4.32	0.55	0.31	0	0	5.18
603.35	354	2.5974	16.5432	3.11215	1.85981	175.03
600.1	355	3.07692	17.0461	3.09007	1.79042	154.23	6.11	46.6	0.0466	1888.57	3.9	0.52	0.07	0	0	4.49
596.95	356	3.1746	17.1606	3.04866	1.90421	148.11
593.5	357	2.89855	17.0716	3.0992	1.91155	150.24	6.2	46.2	0.0462	2599.61	3.81	0.48	0.13	0	0	4.43
589.8	358	2.7027	17.2484	3.02582	1.86647	152.9
586.4	359	2.94118	16.7955	3.097	1.79184	152.95	6.27	45.9	0.0459	3153.59	3.7	0.43	0.36	0	0	4.5
583.3	360	3.22581	17.2927	3.05115	1.87831	149.05
579.45	361	2.5974	17.6463	3.00764	1.91093	150.11	6.23	46.3	0.0463	2891.3	3.75	0.53	0.28	0	0	4.56
576.1	362	2.98507	17.6826	3.12181	1.86751	146.39
572.8	363	3.0303	17.0224	3.08495	1.78506	153.96	6.1	47.5	0.0475	2000.12	4.22	0.49	0	0	0	4.71
568.85	364	2.53165	16.6069	3.05605	1.86452	173.94
565.55	365	3.0303	16.7188	3.10215	1.88698	206.04	6.19	45.3	0.0453	2149.68	3.57	0.6	0.03	0	0	4.2
562.3	366	3.07692	16.7506	3.09969	1.79285	251.32
558.3	367	2.5	16.9316	3.1962	1.81376	287.11	6.14	46.8	0.0468	2125.36	4.03	0.48	0	0	0	4.5
554.9	368	2.94118	17.0152	3.15022	1.87908	253.93
551.7	369	3.125	16.9076	3.00628	1.8463	207.04	6.18	46.4	0.0464	2411.71	3.96	0.52	0.02	0	0	4.49
548.4	370	3.0303	17.11	3.05638	1.81052	171.55
544.65	371	2.66667	16.8887	3.13831	1.83815	158.34	6.19	46.1	0.0461	2365.24	3.81	0.6	0.08	0	0	4.49
541.25	372	2.94118	16.9846	3.09138	1.90078	142.42
538.1	373	3.1746	17.123	3.09812	1.91556	141.63	6.2	44.9	0.0449	2057.86	3.76	0.06	0	0	0	3.82
534.2	374	2.5641	16.8834	3.14707	1.85963	147.97
530.85	375	2.98507	16.7539	3.10273	1.88679	149.8	6.16	46.4	0.0464	2177.23	3.87	0.5	0.15	0	0	4.52
527.55	376	3.0303	16.872	3.04447	1.91562	154.88
523.9	377	2.73973	16.9131	3.06684	1.95482	153.46	6.2	45.1	0.0451	2121.33	3.62	0.48	0.01	0	0	4.11
520.7	378	3.125	16.9822	3.04665	1.90179	145.36
517.35	379	2.98507	16.556	3.13636	1.96591	145.39	6.2	45.3	0.0453	2344.4	3.62	0.5	0.02	0	0	4.15
513.4	380	2.53165	16.6036	3.03399	2.00421	152.1
510.3	381	3.22581	16.287	3.11823	1.99856	138.34	6.21	44.3	0.0443	2098.86	3.29	0.36	0.08	0	0	3.73
506.95	382	2.98507	15.7713	3.29965	1.95769	129.34
503.6	383	2.98507	15.9015	3.27808	1.94498	129.34	6.19	45.7	0.0457	2386	3.6	0.5	0.22	0	0	4.32
500.35	384	3.07692	15.8993	3.25684	1.95423	129.87
496.45	385	2.5641	15.8664	3.23811	1.88776	130.407	6.2	44.9	0.0449	2223.64	3.4	0.05	0.06	0	0	3.51
493.1	386	2.98507	15.9113	3.21127	1.86128	130.943
489.85	387	3.07692	15.6584	3.20628	1.84091	132.227	6.21	44.2	0.0442	2084.68	3.2	0	0.02	0	0	3.22
486.55	388	3.0303	15.9916	3.18009	1.82291	130.943
482.8	389	2.66667	15.4246	3.17125	1.87396	131.48	6.23	43.4	0.0434	1939.69	3.12	0	0	0	0	3.12
479.6	390	3.125	15.8568	3.15011	1.78188	132.56
476.3	391	3.0303	15.963	3.13332	1.78413	166.68	6.25	42.7	0.0427	1769.94	2.92	0	0	0	0	2.92
472.35	392	2.53165	16.5087	3.12821	1.72894	195.12
468.95	393	2.94118	16.4608	3.24035	1.73029	193.85	6.19	44.2	0.0442	1775.78	3.49	0.21	0	0	0	3.7
465.6	394	2.98507	16.7635	3.14586	1.7803	187.16
462.15	395	2.89855	16.9488	3.12557	1.77298	175.79	6.2	44.7	0.0447	2083.14	3.5	0.37	0	0	0	3.86
458.9	396	3.07692	17.0531	3.21504	1.75539	168.82
455.1	397	2.63158	16.9923	3.25952	1.73428	156.43	6.21	44	0.044	1856.56	3.45	0.01	0	0	0	3.46
451.75	398	2.98507	16.9293	3.15557	1.76065	147.76
448.4	399	2.98507	16.8909	3.20029	1.77488	153.79	6.19	44.4	0.0444	1814.87	3.4	0.43	0.01	0	0	3.84
445.1	400	3.0303	16.9115	3.29516	1.76813	153.74
441.9	401	3.125	17.0129	3.30683	1.73376	152.7	6.21	44.6	0.0446	2198.48	3.46	0.37	0	0	0	3.84
437.95	402	2.53165	17.2285	3.24828	1.80569	153.82
434.55	403	2.94118	16.4198	3.1855	1.79248	148.13	6.21	44.6	0.0446	2141.79	3.43	0.36	0	0	0	3.79
431.3	404	3.07692	16.6316	3.33639	1.75418	150.5
427.6	405	2.7027	16.9788	3.27605	1.76155	157.22	6.08	47.2	0.0472	1842.65	4.15	0.38	0	0	0	4.54
424.1	406	2.85714	17.351	3.17584	1.82172	172.17
420.8	407	3.0303	17.3348	3.20572	1.82746	199.12	6.14	46	0.046	1906.13	3.8	0.49	0.01	0	0	4.3
417.3	408	2.85714	17.3792	3.26694	1.78101	214.75
413.95	409	2.98507	17.5711	3.24544	1.7979	193.85	6.19	45.2	0.0452	2046.75	3.53	0.53	0.14	0	0	4.2
409.85	410	2.43902	17.8852	3.20571	1.87827	163.66
406.55	411	3.0303	17.685	3.24742	1.89691	145.3	6.1	47.7	0.0477	2025.49	4.27	0.62	0.01	0	0	4.89
403.25	412	3.0303	18.0893	3.35045	1.86436	138.29
400.05	413	3.125	17.1835	3.22581	1.88544	144.51	6.18	45.1	0.0451	1966.17	3.63	0.49	0	0	0	4.12
396.75	414	3.0303	16.6471	3.11078	1.90287	143.86
393.45	415	3.0303	17.1207	3.13699	1.91891	137.66	6.27	42.9	0.0429	2100.09	3.22	0.06	0	0	0	3.28
390.2	416	3.07692	16.8538	3.21805	1.89569	145.38
386.85	417	2.98507	16.12	3.11269	1.9208	146.98	6.2	44.6	0.0446	2123.32	3.41	0.47	0.02	0	0	3.9
382.8	418	2.46914	16.3027	3.09904	1.99148	141.31
379.35	419	2.89855	16.802	3.09614	2.02305	133.74	6.19	44.8	0.0448	2097.15	3.53	0.41	0	0	0	3.94
375.85	420	2.85714	16.4173	3.1302	2.00528	147.95
371.9	421	2.53165	16.3547	2.95993	2.00939	132.33	6.24	44.6	0.0446	2584.37	3.37	0.48	0.08	0	0	3.93
368.3	422	2.77778	16.0823	2.78136	2.10069	137
364.7	423	2.77778	16.4724	2.76968	2.09288	139.28	6.16	46.6	0.0466	2574.67	3.81	0.47	0.14	0	0	4.42
360.7	424	2.5	15.703	2.9278	1.99463	131.96
357.35	425	2.98507	16.351	2.82758	1.90554	141.89	6.05	48.2	0.0482	2056.95	4.34	0.32	0	0	0	4.66
353.95	426	2.94118	16.0773	2.86332	2.04214	137.46
349.8	427	2.40964	16.0713	2.78736	2.05292	129.29	6.11	47.9	0.0479	2456.53	4.16	0.43	0.21	0	0	4.79
346.2	428	2.77778	15.6487	3.19299	2.0132	112.59
342.75	429	2.89855	15.6477	2.89232	1.92821	139.62	6.17	46.7	0.0467	2661.1	3.88	0.55	0.06	0	0	4.49
339.15	430	2.77778	15.8153	2.91093	1.94984	139.62
335.25	431	2.5641	16.0015	2.77983	1.96985	139.62	6.17	46.5	0.0465	2305.32	3.78	0.56	0.03	0	0	4.47
331.5	432	2.66667	16.1623	3.01743	1.98984	139.62
327.9	433	2.77778	16.3262	2.85644	2.00911	139.62	6.18	46.1	0.0461	2135.27	3.62	0.58	0.07	0	0	4.44
323.65	434	2.35294	16.5828	2.93871	2.01833	139.62
319.75	435	2.5641	16.7775	2.86035	2.02973	153.48	6.18	45.8	0.0458	2025.21	3.61	0.59	0.21	0	0	4.42
316.15	436	2.77778	17.4007	2.91477	2.13427	165.26
312.15	437	2.5	17.4095	3.1606	2.05567	168.46	6.15	45.5	0.0455	1844.64	3.58	0.53	0.08	0	0	4.19
308.45	438	2.7027	17.8518	2.92027	1.98634	176.33
304.9	439	2.8169	17.9907	2.9645	2.1098	190.33	6.19	43.7	0.0437	1702.16	3.08	0.47	0.17	0	0	3.72
300.8	440	2.43902	17.8996	3.00816	2.15679	188.99
297.1	441	2.7027	17.8178	3.11338	2.08444	173.16	6.22	42.5	0.0425	1604.9	2.71	0.51	0.11	0	0	3.33
293.45	442	2.73973	17.9196	2.99724	2.1388	164.88
289.2	443	2.35294	18.0871	2.95667	2.27204	160.25	6.19	44	0.044	1751.78	3.14	0.45	0.3	0	0	3.89
285.6	444	2.77778	18.1331	3.03276	2.23776	161.37
282.1	445	2.85714	18.063	3.3633	2.1573	168.75	6.25	42.7	0.0427	1912.53	2.81	0.45	0.27	0	0	3.53
277.7	446	2.27273	18.755	2.98888	2.21214	164.89
274.05	447	2.73973	18.7518	3.01039	2.37102	167.55	6.24	43.7	0.0437	2032.3	3.09	0.51	0.43	0.03	0	4.05
270.4	448	2.73973	18.761	3.14847	2.33969	165.27
266.25	449	2.40964	18.5477	3.42025	2.24332	164.82	6.32	40.5	0.0405	1782.89	2.47	0.47	0.06	0	0	3.01
262.8	450	2.89855	18.3482	3.19423	2.30981	158.38
259.1	451	2.7027	18.5534	2.89152	2.37969	161.04	6.33	41	0.041	1971.1	2.52	0.49	0.22	0	0	3.23
255.1	452	2.5	18.1997	2.9312	2.36615	156.41
251.3	453	2.63158	17.9224	3.09255	2.29496	158.56	6.34	41.9	0.0419	2182.9	3.03	0.57	0	0	0	3.6
247.6	454	2.7027	18.1881	2.92457	2.40812	158.62
243.75	455	2.5974	18.2412	2.92115	2.46524	153.47	6.34	41	0.041	2026.36	2.54	0.52	0.43	0.01	0	3.5
239.65	456	2.43902	18.0095	2.89714	2.44446	160.31
236.35	457	3.0303	17.9707	2.9239	2.41701	163.5	6.36	43.6	0.0436	2728.95	3.08	0.77	0.74	0.12	0	4.7
232.5	458	2.5974	16.974	3.57116	1.98064	163.72
228.3	459	2.38095	17.3614	3.47326	1.95667	167.36	6.35	43.8	0.0438	2766.68	3.5	0.94	0.15	0	0	4.59
224.55	460	2.66667	17.2674	3.43674	1.94493	159.07
220.8	461	2.66667	17.2821	3.42506	1.87788	150.63	6.3	45.4	0.0454	3022.59	3.67	0.81	0.42	0	0	4.91
216.7	462	2.43902	16.9646	3.41222	1.85899	157.98
213.05	463	2.73973	16.6694	3.38339	1.91403	169.38	6.26	47.3	0.0473	3290.8	4.18	1.02	0.14	0	0	5.34
209.4	464	2.73973	16.5239	3.41114	1.90793	165.41
205.2	465	2.38095	16.6903	3.42093	1.8612	172.45	6.3	46.1	0.0461	3353.13	4.05	0.84	0	0	0	4.89
201.9	466	3.0303	16.9384	3.45596	1.8484	173.32
198	467	2.5641	17.2784	3.37009	1.8415	178.85	6.29	47.3	0.0473	3842.05	4.22	0.96	0.14	0	0	5.31
193.8	468	2.38095	16.8931	3.24642	1.8551	190.38
189.75	469	2.46914	17.1685	3.3516	1.8522	187.84	6.23	48.9	0.0489	3925.02	4.49	0.92	0.27	0	0	5.68
186	470	2.66667	16.8103	3.27908	1.85262	170.98
182.5	471	2.85714	16.8038	3.24268	1.86282	179.13	6.18	49.6	0.0496	3759.01	4.8	0.91	0.01	0	0	5.72
178.25	472	2.35294	17.1852	3.28886	1.89607	176.34
174.55	473	2.7027	16.9566	3.23661	1.79586	173.88	6.18	50.6	0.0506	4566.17	4.82	0.89	0.38	0	0	6.1
171.1	474	2.89855	16.6014	3.16866	1.80507	171.647
166.9	475	2.38095	16.3353	3.12003	1.88284	179.37	6.09	54.4	0.0544	3629	5.94	1.34	0.05	0	0	7.34
163.4	476	2.85714	16.2507	3.09881	1.90249	182.44
159.8	477	2.77778	16.1573	3.09295	1.90976	174.585	6.12	50.3	0.0503	2968.25	4.97	0.84	0.02	0	0	5.83
155.65	478	2.40964	16.0831	3.01698	1.89078	174.385
152.05	479	2.77778	15.9073	2.94226	1.85837	171.075	6.06	53.2	0.0532	3309.26	5.62	1.09	0.07	0	0	6.79
148.4	480	2.73973	15.5981	2.97196	1.8428	163.63
144.6	481	2.63158	15.3721	2.91569	1.854	160.865	6	58	0.058	4511.93	6.86	1.46	0.09	0	0	8.42
140.8	482	2.63158	15.3706	2.86357	1.85832	156.765
136.65	483	2.40964	15.5727	2.90257	1.83878	162.89	5.99	58.8	0.0588	4544.09	6.99	1.54	0.19	0	0	8.72
133.1	484	2.8169	15.8063	2.96588	1.84315	157.91
129.3	485	2.63158	17.0965	2.9287	1.93227	156.8	6.05	54	0.054	3519.62	6.22	0.79	0	0	0	7.01
125.2	486	2.43902	16.5797	2.93101	1.91009	161.73
121.55	487	2.73973	16.4687	2.9045	1.88564	166.52	6.03	56.9	0.0569	4371.18	6.47	1.3	0.29	0	0	8.06
118.05	488	2.85714	16.6352	2.95626	1.83258	171.54
113.75	489	2.32558	16.8138	2.78258	1.8386	181	5.94	61.1	0.0611	5098.45	7.61	1.68	0.09	0	0	9.39
110.1	490	2.73973	16.4433	2.80114	1.85317	174.09
106.6	491	2.85714	16.3985	2.81575	1.78195	165.77	5.95	62.2	0.0622	5709.96	7.71	1.75	0.3	0	0	9.76
102.35	492	2.35294	16.2411	2.89645	1.79041	161.32
98.45	493	2.5641	16.2362	2.781	1.80894	152.62	5.96	61.2	0.0612	5255.65	7.48	1.78	0.18	0	0	9.43
94.9	494	2.8169	16.5388	2.7472	1.78265	151.29
91.2	495	2.7027	16.2357	2.84478	1.77635	146.51	5.98	60.1	0.0601	4771.1	7.66	1.44	0	0	0	9.09
87.3	496	2.5641	16.2894	2.82215	1.7631	153.62
83.2	497	2.43902	16.2277	2.81108	1.7919	149.23	5.96	62.1	0.0621	6201.9	7.67	1.86	0.17	0	0	9.7
79.75	498	2.89855	16.4176	2.89083	1.85622	150.11
76.3	499	2.89855	16.7889	2.8563	1.76315	143.71	6.01	60.7	0.0607	5446.39	7.37	1.83	0.11	0	0	9.31
72.15	500	2.40964	16.6702	2.88032	1.79863	150.23
68.5	501	2.73973	16.7465	2.85697	1.84143	145.41	6.02	59.6	0.0596	5246.34	7.81	1.14	0	0	0	8.95
64.5	502	2.40964	16.6189	2.85125	1.84129	146.21
60.5	503	2.40964	16.7553	2.86901	1.8147	147.65	6.06	57.8	0.0578	5000.73	7.55	0.81	0	0	0	8.35
56.5	504	2.40964	16.7601	2.84342	1.83326	148.72
52.5	505	2.40964	17.0981	2.8326	1.8884	156.01	6.03	58.8	0.0588	5037.9	6.8	1.7	0.28	0	0	8.78
49	506	2.73973	16.9757	2.9703	1.9399	169.16
45	507	2.40964	17.103	2.93166	1.88972	148.53	6.04	58.7	0.0587	5284.75	6.86	1.58	0.28	0	0	8.72
41	508	2.40964	16.7926	2.885	1.92334	144.32
37	509	2.40964	16.7696	2.82867	1.93259	149.76	5.98	62.3	0.0623	6098.19	7.23	1.76	0.61	0.19	0	9.79
33	510	2.40964	17.1479	2.88532	1.95909	144.5
29.5	511	2.73973	17.2349	2.89944	1.96038	142.46	6.03	57.1	0.0571	4305.14	6.85	1.25	0	0	0	8.1
25.5	512	2.40964	17.1777	3.17128	1.69783	146.87
21.5	513	2.40964	17.2751	3.09162	1.74958	151.92	6.03	57.3	0.0573	4621.56	6.58	1.54	0.1	0	0	8.22
17.5	514	2.40964	16.8619	3.08637	1.77151	154.71
13.5	515	2.40964	16.613	3.08834	1.74097	156.31	6.02	57.8	0.0578	4869.9	6.61	1.56	0.22	0	0	8.39
10	516	2.73973	16.7545	3.04967	1.64505	167.93
6	517	2.40964	16.2569	2.9572	1.71206	181.32	5.97	61.2	0.0612	5883.76	7.3	1.75	0.41	0	0	9.45
2	518	2.40964	15.951	2.85816	1.7149	179.7
-1	519	2.40964	16.3811	3.01209	1.70249	169.27	5.95	63.3	0.0633	5669.26	7.4	2.14	0.53	0	0	10.07
-4	520	2.40964	16.2631	3.11152	1.65722	150.69
-6.5	521	2.73973	16.5414	2.92177	1.69119	146.43	5.98	59.8	0.0598	4861.6	7.28	1.68	0.04	0	0	9
-10	522	2.73973	16.7049	2.91186	1.68547	142.95
-13	523	2.73973	16.698	3.0286	1.68334	137.55	5.98	61.7	0.0617	6476.96	7.74	1.85	0	0	0	9.59
